1     **A Safe Harbor-Targeted CRISPR/Cas9 Homology Independent Targeted Integration**  
2     **(HITI) System for Multi-Modality Reporter Gene-Based Cell Tracking**

3  
4     John J Kelly<sup>1,2</sup>, Moe Saeed-Marand<sup>2</sup>, Nivin N Nyström<sup>1,2</sup>, Yuanxin Chen<sup>1</sup>, Melissa M Evans<sup>1</sup>,  
5                                     Amanda M Hamilton<sup>1</sup>, John A Ronald<sup>1,2\*</sup>

6  
7     <sup>1</sup>Robarts Research Institute and <sup>2</sup>Dept. of Medical Biophysics, University of Western Ontario,  
8                                     London, Ontario, N6A 5B7, Canada

9  
10  
11    Key words: CRISPR, reporter gene, HITI, cell tracking, AAVS1

12  
13    Address correspondence to:

14    Dr. John A. Ronald

15    Robarts Research Institute,

16    Schulich School of Medicine and Dentistry,

17    University of Western Ontario,

18    London, Ontario, N6A 5B7,

19    Canada

20    Tel: 519-931-5777 x24391

21    Email: jronald@robarts.ca

22 **Abstract**

23 Imaging reporter genes can provide valuable, longitudinal information on the biodistribution,  
24 growth and survival of engineered cells in preclinical models and patients. A translational  
25 bottleneck to using reporter genes in patients is the necessity to engineer cells with randomly-  
26 integrating vectors. CRISPR/Cas9 targeted knock-in of reporter genes at a genomic safe harbor  
27 locus such as adeno-associated virus integration site 1 (AAVS1) may overcome these safety  
28 concerns. Here, we built Homology Independent Targeted Integration (HITI) CRISPR/Cas9  
29 minicircle donors for precise AAVS1-targeted simultaneous knock-in of fluorescence,  
30 bioluminescence, and MRI (*Oatp1a1*) reporter genes. Our results showed greater knock-in  
31 efficiency at the AAVS1 site using HITI vectors compared to homology-directed repair donor  
32 vectors. Characterization of select HITI clones demonstrated functional fluorescence and  
33 bioluminescence reporter activity as well as significantly increased *Oatp1a1*-mediated uptake of  
34 the clinically-approved MRI agent gadolinium ethoxybenzyl diethylenetriamine pentaacetic acid.  
35 As few as  $10^6$  *Oatp1a1*-expressing cells in a 50  $\mu$ l subcutaneous injection could be detected *in*  
36 *vivo* with contrast-enhanced MRI. Contrast-enhanced MRI also improved the conspicuity of both  
37 sub-cutaneous and metastatic *Oatp1a1*-expressing tumours prior to them being palpable or even  
38 readily visible on pre-contrast images. Our work demonstrates the first CRISPR/Cas9 HITI  
39 system for knock-in of large DNA donor constructs at a safe harbor locus, enabling multi-modal  
40 longitudinal *in vivo* imaging of cells. This work lays the foundation for safer, non-viral reporter  
41 gene tracking of multiple cell types.

42

## 43 Introduction

44  
45 Molecular-genetic imaging with reporter genes permits the *in vivo* visualization and tracking of  
46 engineered cells, and thus, allows one to track the biodistribution, persistence, viability and in  
47 some cases, activation state, of such cells<sup>1,2</sup>. Several reporter genes currently exist for visualizing  
48 engineered cells using pre-clinical optical fluorescence imaging (FLI) and bioluminescence  
49 imaging (BLI)<sup>3-5</sup> as well as those for clinical modalities such as magnetic resonance imaging  
50 (MRI), positron emission tomography (PET) and photoacoustic imaging<sup>6-8</sup>. These non-invasive  
51 cell tracking tools are invaluable for understanding mechanisms of disease progression and the  
52 evaluation of treatments in pre-clinical animal models. Important examples in cancer research  
53 include the tracking of therapeutic stem cells<sup>9-11</sup>, tracking immune cell migration, cancer  
54 progression and metastasis<sup>12-14</sup>, and evaluating tumour response to novel anticancer  
55 therapeutics<sup>15,16</sup>. More recently, the use of reporter genes to track therapeutic cells has been  
56 translated into the clinic. In this case, cytotoxic T cells were engineered to express a chimeric  
57 antigen receptor to target glioma cells, as well as a herpes simplex virus type 1 thymidine kinase  
58 (HSV1-TK) dual reporter-suicide gene (that selectively uptakes the PET tracer [<sup>18</sup>F]FHBG) to  
59 track the localization and viability of the injected therapeutic cells in glioma patients<sup>17,18</sup>.

60  
61 Although reporter genes have great potential for therapeutic cell tracking, their functionality is  
62 best utilized when the genes are stably integrated into the desired cell's genome – allowing  
63 reporter gene expression throughout the lifetime of the cell and in any subsequent daughter cells.  
64 Retroviral vectors, such as those derived from HIV lentiviruses, have generally been used for  
65 transgene integration due to their high transfection efficiency, large transgene capacity and their  
66 ability to transduce a variety of dividing and non-dividing cell types. However, the slow  
67 acceptance of using reporter genes for tracking cell-based therapies may in part be due to the  
68 increased risk of random or quasi-random insertional mutagenesis when transgenes are delivered  
69 using viral vectors<sup>19</sup>. Indeed, in previous clinical trials involving children with X-linked severe  
70 combined immunodeficiency, a Moloney murine leukemia virus–based  $\gamma$ -retrovirus vector  
71 expressing the interleukin-2 receptor  $\gamma$ -chain ( $\gamma c$ ) complementary DNA successfully restored  
72 immunity in most patients. However, 5 of the 20 patients also developed leukemia, of which one  
73 child died, as a result of insertional mutagenesis and transactivation of proto-oncogenes<sup>20-22</sup>. For  
74 future cell-based therapies, it is therefore highly desirable to edit cells with reporter genes in a

75 safe and site-specific manner. The application of such editing tools would allow for longitudinal  
76 cell tracking to confirm that the cells are performing their intended role, as well as to detect any  
77 ectopic growths or misplaced targeting at the earliest time point. This will ultimately give the  
78 clinician greater control and confidence in the outcomes of the targeted therapy.

79

80 Genomic safe harbors can incorporate exogenous pieces of DNA and permit their predictable  
81 function, but do not cause alterations to the host genome, nor pose a risk to the host cell or  
82 organism<sup>23</sup>. Several studies have successfully used genome editing tools such as zinc finger  
83 nucleases (ZFN) and transcription activator-like effector nucleases (TALENs) to incorporate  
84 reporter genes at the adeno-associated virus integration site 1 (AAVS1) safe harbor locus, with  
85 no detrimental effects<sup>24–26</sup>. Although ZFN and TALENs have shown great promise as targeted  
86 DNA editors, they are time consuming, expensive and challenging to engineer as new nuclease  
87 sequences must be generated for every new genomic target. Alternatively, clustered regularly  
88 interspaced short palindromic repeat/Cas9 (CRISPR/Cas9), which was developed by several  
89 groups in 2013<sup>27–30</sup>, allows for quicker, cheaper and easier-to-design human genome editing.  
90 CRISPR/Cas9 utilizes short guide RNAs (gRNAs; ~20bp in length) to direct the Cas9  
91 endonuclease to a specific genomic locus and induce a double stranded DNA break. Both the  
92 Cas9 enzyme and gRNA sequences can be encoded in a single plasmid and when co-transfected  
93 with a donor DNA plasmid can lead to higher homology directed repair (HDR) knock-in  
94 efficiency than previous editing tools<sup>31</sup>. We have previously described the first CRISPR-Cas9  
95 system for AAVS1 integration of donor constructs containing an antibiotic resistance selection  
96 gene and both fluorescence (*tdTomato*) and bioluminescence (*Firefly luciferase*) reporter  
97 genes<sup>32</sup>. We were able to confirm the correct and stable integration of donor DNA at the AAVS1  
98 site and functional reporter gene expression *in vivo*. However, some of the limitations of our  
99 study include (i) the low editing efficiency (~3.8%) of HEK-293T cells; (ii) the use of large  
100 CRISPR/Cas9 and donor DNA plasmids that contained bacterial and antibiotic resistance genes –  
101 which limit transfection efficiency and would have associated safety concerns for clinical  
102 translation; and (iii) the lack of a translationally relevant reporter gene. In this study, we aimed to  
103 address these limitations by improving the efficiency and clinical safety of reporter gene  
104 integration at the AAVS1 safe harbor site and included a translationally relevant reporter gene.

105

106 We posited that the low editing efficiency of our first system was due in part to reduced  
107 transfection and knock-in efficiency, which is common with larger DNA plasmids, and the use of  
108 the HDR repair pathway for integration, which is intrinsically inefficient and not readily  
109 accessible to non-dividing cells<sup>33</sup>. In contrast to HDR-mediated DNA repair, the non-  
110 homologous end joining (NHEJ) pathway is active in both proliferating and non-proliferating  
111 cells and is generally considered more efficient than HDR in mammalian cells<sup>34</sup>. Recent studies  
112 have shown that by designing a CRISPR/Cas9 system that includes the same gRNA cut site in  
113 the donor vector as the genomic target site, the NHEJ repair pathway will more efficiently lead  
114 to transgene integration in zebrafish<sup>35</sup> and mammalian cells<sup>36,37</sup>. Suzuki *et al.* refer to this  
115 mechanism as homology independent targeted integration (HITI), which is expected to lead to  
116 increased insertion in the forward rather than the reverse direction, as intact gRNA target  
117 sequences will be preserved in the latter<sup>38</sup>. Therefore, we postulated that HITI will increase the  
118 efficiency of reporter gene integration at the AAVS1 site (Figure 1A), compared to HDR. To  
119 address the problem of size and bacterial/antibiotic resistance genes in plasmids, our group and  
120 Suzuki *et al.*<sup>38</sup>, previously designed minicircles (MC) to express genes of interest<sup>39,40</sup>. First  
121 described by Darquet *et al.*<sup>41</sup>, MCs lack the bacterial backbone and antibiotic resistance genes  
122 that would otherwise compromise biosafety and clinical translation. In addition, the removal of  
123 the prokaryotic backbone also greatly reduces the size of the vector, thus improving transfection  
124 efficiency or providing space for the inclusion of other transgenes. To that end, we aimed to  
125 improve on our previous work by including a translationally relevant reporter gene in a multi-  
126 modality imaging HITI MC donor. We determined that the rat organic-anion-transporting  
127 polypeptide 1A1 (*Oatp1a1*) gene was an ideal candidate. *Oatp1a1* is a positive contrast magnetic  
128 resonance imaging (MRI) reporter gene due to its ability to uptake a clinically approved, liver-  
129 specific paramagnetic contrast agent called gadolinium ethoxybenzyl diethylenetriamine  
130 pentaacetic acid (Gd-EOB-DTPA; Primovist/Eovist)<sup>42</sup>. We have previously shown that *Oatp1a1*  
131 is a sensitive, quantitative, MRI reporter for 3-dimensional cancer cell distribution *in vivo*<sup>43</sup>. The  
132 purpose of this study was to develop HITI MC donor vectors for CRISPR/Cas9 editing of cells at  
133 the AAVS1 locus with three reporter genes to allow for multimodality, longitudinal *in vivo*  
134 monitoring of their fate following transplantation.

135

## 136 **Materials and Methods**

137

## 138 Constructs

139 Construct designs are shown in Figure 1B. The pCas9-AAVS1guideRNA-zsG-MC (Cas9-  
140 AAVS1-MC) and pCas9-scrambledRNA-zsG-MC (Cas9-scrambled-MC) parental plasmids  
141 originated from pCas-Guide-AAVS1 and pCas-Guide-Scrambled plasmids purchased from  
142 Origene (Maryland, USA). The Cas9 enzyme and guide RNA sequences were cloned between  
143 *attB* and *attP* recombination sites in a minicircle bacterial backbone containing a ZsGreen (*zsG*)  
144 fluorescence reporter driven by the elongation factor 1- $\alpha$  promoter (*hEF1 $\alpha$* ). The AAVS1-HDR-  
145 tdT-Fluc2-Oatp1a1-MC (HDR-MC) construct was derived from an HDR vector lacking the  
146 *Oatp1a1* gene as we described previously<sup>32</sup>. This plasmid is driven by the *hEF1 $\alpha$*  promoter,  
147 expresses tdTomato (*tdT*), firefly luciferase (*Fluc2*) and Organic anion transporting polypeptide  
148 1a1 (*Oatp1a1*) using a self-cleaving 2a peptide system. For improved expression, the plasmids  
149 also contain the woodchuck hepatitis virus post-transcriptional regulatory element (*WPRE*)  
150 followed by the human growth hormone polyadenylation signal (*hGH* polyA). The HDR plasmid  
151 contains the left and right homologous arms (RHA:527bp, LHA:481bp) that are complementary  
152 to the region flanking the AAVS1 cut site; the homologous arms were obtained from the  
153 pAAVS1-puroDNR plasmid from Origene (Maryland, USA). The *Oatp1a1* gene was added  
154 through PCR amplification from a previously made vector we constructed using  
155 PGK\_Straw\_E2A\_Oatp1a1 (a kind gift from Dr. Kevin Brindle's laboratory; University of  
156 Cambridge). Using the HDR-MC parental plasmid as the template, we generated the pAAVS1-  
157 HITI-tdT-Fluc2-Oatp1a1-MC (HITI-MC) parental plasmid using the In-Fusion cloning kit from  
158 Clontech (Takara Bio, California, USA). Using restriction enzyme digestion, we extracted the  
159 bacterial backbone and minicircle recombination sites and then extracted the three reporter genes  
160 (without the homologous arms); *tdT*, *Fluc2* and *Oatp1a1* from the HDR-MC construct using  
161 PCR. However, for HITI functionality we designed our primers to also include a 23 bp extension  
162 (5'-GTTAATGTGGCTCTGGTTCTGGG-3') downstream of the polyA sequence, which  
163 incorporates the same cut site and protospacer adjacent motif (PAM) sequence for our AAVS1  
164 gRNA which allows for Cas9 cutting of both the MC and genomic DNA.

165

## 166 Minicircle Production

167 ZYCY10P3S2T *E. coli* (System Biosciences, Palo Alto, CA, USA) were transformed with the  
168 original parental plasmids (PP) of all four constructs; HDR-MC or HITI-MC, Cas9-AAVS1-MC

169 and Cas9-scrambled-MC and viable colonies selected using kanamycin plates. Colonies were  
170 picked 24 hrs after transformation, grown in 6 ml of lysogeny broth (LB) with kanamycin for 6  
171 hrs at 37°C, followed by growth in terrific broth (TB) for 12 hrs at 37°C. To induce expression of  
172 the phiC31 integrase for MC production via *attB* and *attP* recombination, 100 ml of LB broth  
173 together with 100 µl of 20% arabinose induction solution (System Biosciences, Palo Alto, CA,  
174 USA) and 4 ml of 1N NaOH was added to the culture and grown for 5.5 hrs at 30°C. An  
175 endotoxin-free maxi kit (Qiagen, Valencia, CA, USA) was used to purify both PP and MC.  
176 Following purification of the MC products, PP contamination was removed using the Plasmid  
177 Safe ATP-dependent DNase kit (Epicentre, WI, USA), and the products were cleaned and  
178 concentrated using the Clean & Concentrator-25 kit (Zymo Research, CA, USA).

179

#### 180 Cell Culture and Transfection

181 Human embryonic kidney 293T cells and human adenocarcinoma HeLa cells (both from ATCC,  
182 Manassas, VA, USA) were grown in DMEM medium (Wisent Bioproducts, Québec, Canada)  
183 supplemented with 10% Fetal Bovine Serum (FBS; Wisent Bioproducts, Québec, Canada) and  
184 1x Antibiotic-Antimycotic (ThermoFisher, Waltham, MA, USA). Human grade 4  
185 adenocarcinoma PC3 cells were a kind gift from Dr. Hon Leong (Western University, ON,  
186 Canada) and were grown in RPMI (Wisent Bioproducts, Québec, Canada) supplemented with  
187 5% FBS and 1x Antibiotic-Antimycotic. Cells were transfected with the linear polyethylenimine  
188 transfection agent jetPEI (Polyplus-transfection, Illkirch, France), according to the  
189 manufacturer's instructions. Briefly, cells were grown in 6-well plates until 80-90% confluency  
190 and co-transfected with 1 µg each of Cas9-AAVS1-MC or Cas9-Scrambled-MC together with 1  
191 µg of the donor MC constructs: HDR-MC or HITI-MC, for a total DNA mass of 2 µg. The DNA  
192 was prepared in 150 mM NaCl and complexed with 4 µl of jetPEI reagent per well.

193

#### 194 FACS and Flow Analysis

195 All FACS and flow cytometry was performed at the London Regional Flow Cytometry Facility  
196 (Robarts Research Institute, London, Canada). Forty-eight hours post transfection, the population  
197 of cells displaying both red (tdTomato) and green (zsGreen) fluorescence were sorted using a BD  
198 FACSARIA III cell sorter (BD Biosciences, San Jose, CA, USA). At selected timepoints  
199 following FACS the cells were analyzed for tdTomato fluorescence using a FACSCanto flow

200 cytometer (BD Biosciences, San Jose, CA, USA). Either 14- or 21-days post the initial sort, the  
201 cells were again sorted on the FACSARIA III to purify tdTomato positive cells only (referred to as  
202 the pooled population). In this regard, our protocol aimed to sort cells that had incorporated the  
203 MC inserts (based on tdTomato fluorescence) into the genome and excluded any cells that had  
204 randomly integrated Cas9 MC DNA (zsGreen). At the same time as the second (tdTomato) sort,  
205 individual cells were plated into wells of a 96-well plate to enable single cell colonies to be  
206 grown and expanded (referred to as clonal cell populations).

207

### 208 Genomic DNA Extractions and AAVS1 Integration Analysis

209 Extraction of genomic DNA from the pooled population of cells was performed using the  
210 DNeasy Blood and Tissue kit (Qiagen, Valencia, CA, USA) following manufacturer's  
211 instructions. DNA quality and concentrations were measured on a NanoDrop 1000  
212 spectrophotometer (ThermoFisher). Extraction of genomic DNA from clonal populations was  
213 performed as we described previously<sup>32</sup>. Briefly, cell pellets were resuspended in a QuickExtract  
214 DNA extraction solution (Lucigen, Middleton, WI, USA), incubated at 65°C for 10 mins,  
215 vortexed and incubated at 98°C for 5 mins. The DNA was then directly used for PCR or stored at  
216 -20°C. To check for integration at the AAVS1 site, two primers were designed to amplify the 3'  
217 junction between the donor cassette and the AAVS1 site outside of the homologous arm region.  
218 The forward primer was uniquely complementary to the polyA tail in the MC cassette (5'-  
219 CCTGGAAGTTGCCACTCCAG-3') and the reverse primer to the AAVS1 site (5'-  
220 AAGGCAGCCTGGTAGACAGG-3'). A 1.3 kb PCR product was produced if the MC-HDR  
221 was correctly integrated at the AAVS1 site and a 1.7 kb PCR product if MC-HITI was correctly  
222 integrated. GAPDH primers were designed as DNA loading controls and to confirm successful  
223 DNA extractions: forward 5'-TTGCCCTCAACGACCACTTT-3' and reverse 5'-  
224 GTCCCTCCCCAGCAAGAATG-3' and yielded a PCR product of 502 bp. Agarose gel  
225 electrophoresis with 1% agarose gels and RedSafe (FroggaBio, ON, Canada) was used to  
226 separate and visualize PCR products.

227

### 228 In Vitro Fluorescence and Bioluminescence Imaging

229 The pooled and clonal cell populations were evaluated for tdTomato fluorescence expression on  
230 an EVOS FL auto 2 microscope (ThermoFisher, Waltham, MA, USA). For BLI experiments,



231 varying cell numbers were plated in triplicates into black walled 96-well plates. D-luciferin (0.1  
232 mg/ml; PerkinElmer, Waltham, MA, USA) was added to each well and images rapidly collected  
233 on an IVIS Lumina XRMS In Vivo Imaging System (PerkinElmer) equipped with a cooled CCD  
234 camera. Average radiance values in photons/sec/cm<sup>2</sup>/steradian were measured from regions of  
235 interest drawn around each well using LivingImage software (PerkinElmer).

236

### 237 *In Vitro* Magnetic Resonance Imaging

238 Naïve and Oatp1a1-expressing cell clones (2×10<sup>6</sup>) were seeded in T-175 flasks and grown for 3  
239 days. Cells were incubated with media containing 6.4 mM Gd-EOB-DTPA or with media  
240 containing an equivalent volume of PBS for 90 minutes at 37°C and 5% CO<sub>2</sub>. Cells were then  
241 washed 3 times with PBS, trypsinized and pelleted in 0.2 mL Eppendorf tubes, and placed into a  
242 2% agarose phantom mould that was incubated in a 37°C chamber for two hours to mimic body  
243 temperature. MRI was performed on a 3-Tesla GE clinical MRI scanner (General Electric  
244 Healthcare Discovery MR750 3.0 T, Milwaukee, WI, USA) and a 3.5-cm diameter birdcage RF  
245 coil (Morris Instruments, Ottawa, ON, Canada). A fast spin echo inversion recovery (FSE-IR)  
246 pulse sequence was used with the following parameters: field of view (FOV) = 256 x 256,  
247 repetition time (TR) = 5000 msec, echo time (TE) = 19.1 msec, echo train length (ETL) = 4,  
248 number of excitations (NEX) = 1, receiver bandwidth (rBW) = 12.50 MHz, inversion times (TI)  
249 = 50, 100, 125, 150, 175, 200, 250, 350, 500, 750, 1000, 1500, 2000, 2500, 3000 msec, in-plane  
250 resolution = 0.27 mm<sup>2</sup>, slice thickness = 2.0 mm, scan time = 5 min and 25 sec per inversion  
251 time. Spin-lattice relaxation rates were computed via MatLab by overlaying the image series and  
252 calculating the signal intensity on a pixel-by-pixel basis across the inversion time image series,  
253 followed by a fitting of the data into the following equation to output the spin-lattice relaxation  
254 time, where S represents signal intensity, κ represents the scaling factor, and ρ represents proton  
255 spin density:

$$256 \quad S = \kappa \cdot \rho (1 - 2 \cdot e^{((-TI)/T1)} + e^{((-TR)/T1)})$$

257

### 258 Animal models

259 All animal protocols were approved by the University Council on Animal Care at the University  
260 of Western Ontario (Protocol #2015-058) and follow the Canadian Council on Animal Care  
261 (CCAC) and Ontario Ministry of Agricultural, Food and Rural Affairs (OMAFRA)

262 guidelines. Crl:NU-*Foxn1*<sup>nu</sup> (nude) male mice (Charles River Laboratories, Wilmington, MA,  
263 USA; N = 3-5) aged 6-8 weeks were used for subcutaneous tumour model injections and  
264 NOD.Cg-*Prkdc*<sup>scid</sup> *Il2rg*<sup>tm1Wjl</sup>/SzJ (NSG) immunodeficient male mice (obtained from the  
265 Humanized Mouse and Xenotransplantation Facility at the Robarts Research Institute, University  
266 of Western Ontario, London, Canada; N = 3) for experimental metastasis models (intravenous  
267 cell injections).

268

### 269 *In Vivo* Bioluminescence Imaging

270 BLI was performed on the same IVIS Lumina XRMS system described for *in vitro* imaging.  
271 Mice were anesthetized with 2% isoflurane in 100% oxygen using a nose cone attached to an  
272 activated carbon charcoal filter for passive scavenging and kept warm on a heated stage. BLI  
273 images were acquired with automatic exposure times until the peak BLI signal was obtained (up  
274 to 40 mins). Regions of interest were manually drawn using LivingImage software to measure  
275 average radiance (photons/sec/cm<sup>2</sup>/sr). The peak average radiance was used for quantification for  
276 each mouse.

277

### 278 *In Vivo* Magnetic Resonance Imaging and Quantification

279 All mouse MRI scans were performed with a custom-built gradient insert and a bespoke 5 cm  
280 diameter solenoidal RF coil, as we described previously<sup>43</sup>. Mice were kept anaesthetized during  
281 the scan with 2% isoflurane administered via a nose cone attached to the coil. *T*<sub>1</sub>-weighted  
282 images were acquired using a spoiled gradient recalled acquisition in steady-state pulse sequence  
283 using the following parameters: field of view, 50 mm; repetition time, 14.7 msec; echo time, 10.5  
284 msec; receiver bandwidth, 31.25 MHz; echo train length, 4; frequency and phase, 250 x 250; flip  
285 angle, 60 degrees; number of excitations, 3; 200 μm isotropic voxels; scan time, approximately  
286 15 minutes per mouse. Pre-contrast images were acquired followed by administration of 1.67  
287 mmol/kg Gd-EOB-DTPA (Primovist; Bayer, Mississauga, ON, Canada) via the tail vein. Mice  
288 were then re-imaged 20 minutes later for immediate post-contrast images, which provide positive  
289 contrast to many tissues, including the naïve tumours, as a result of Gd-EOB-DTPA pooling;  
290 and/or 5 hours later for Oatp1a1-specific uptake. This time-point was determined to allow  
291 enough time for Gd-EOB-DTPA to be cleared, yet still provide strong positive contrast in  
292 Oatp1a1-expressing cells<sup>42,43</sup>. Contrast-to-noise ratio (CNR) measurements were calculated from

293 MR images using ITK-snap open source software ([www.itksnap.org](http://www.itksnap.org))<sup>44</sup>. Tumours were manually  
294 segmented in 3 dimensions by tracing the tumour or control tissue (hind leg muscle) with  
295 polygon and paintbrush tools and pixel intensity recorded in every slice. The CNR of tumours  
296 was calculated by taking the signal intensity of the difference between tumour regions and  
297 muscle tissue divided by the standard deviation of background signal

$$298 \left( CNR = \frac{\text{attenuation}_{\text{tumour}} - \text{attenuation}_{\text{muscle}}}{\text{Std.Dev.}_{\text{background}}} \right).$$

299

### 300 Oatp1a1-induced Gd-EOB-DTPA uptake MRI and BLI sensitivity

301 To evaluate the cellular detection sensitivity of Oatp1a1 expressing cells with Gd-EOB-DTPA-  
302 enhanced MRI, nude mice were injected with 50  $\mu$ l of cell suspensions in PBS containing  $3 \times 10^6$   
303 total cells/injection at the following ratios:  $3 \times 10^6$  naïve cells alone;  $10^4$  PC3-HITI +  $2.99 \times 10^6$   
304 naïve cells;  $10^5$  PC3-HITI +  $2.9 \times 10^6$  naïve cells;  $10^6$  PC3-HITI +  $2 \times 10^6$  naïve cells; and  $3 \times 10^6$   
305 PC3-HITI cells alone, subcutaneously in 5 locations on the back/flank region. Immediately after  
306 cell injections, 1.67 mmol/kg Gd-EOB-DTPA was injected into the tail vein and mice were  
307 imaged on a 3T clinical grade MR scanner 5 hours later. This time point allows for clearance of  
308 Gd-EOB-DTPA from the body yet provides sufficient time for the agent to penetrate the  
309 subcutaneous injections sites and accumulate in Oatp1a1 expressing cells. After MRI, mice were  
310 moved to the IVIS scanner and injected with 100  $\mu$ l of 30 mg/ml D-Luciferin intraperitoneally  
311 and BLI was performed, as described earlier.

312

### 313 293T and PC3 tumour models

314 293T or PC3 naïve and HITI engineered cells were injected subcutaneously ( $2.5 \times 10^6$  293Ts and  
315  $1 \times 10^6$  PC3s) on the left and right flanks of nude mice, respectively (293T, N = 2; PC3, N = 5).  
316 For experimental metastasis studies,  $5 \times 10^5$  PC3 naïve or HITI engineered cells were injected into  
317 the tail veins of NSG mice (N = 3). Tumour growth was tracked on a weekly basis with BLI, as  
318 described above. MRI was performed on mice at various timepoints, as indicated in the results  
319 section. Firstly, a pre-contrast scan was performed on all mice, followed immediately with  
320 injection of the Gd-EOB-DTPA contrast agent into the tail vein (1.67 mmol/kg). For some  
321 experiments the mice were re-scanned 15-20 mins after contrast injection to show tumour and  
322 whole-body distribution of Gd-EOB-DTPA. In all instances MRI scans were performed ~5 hours  
323 post-contrast injection since Oatp1a1 expressing cells still retain Gd-EOB-DTPA and show

324 strong positive contrast at this time point. This also allows enough time for washout of Gd-EOB-  
325 DTPA in most tissues and organs (except for the gastrointestinal tract and bladder where cleared  
326 Gd-EOB-DTPA accumulates before being excreted)<sup>42</sup>.

327

### 328 Statistics

329 Statistical analysis was performed with GraphPad Prism version 7 (GraphPad Software Inc., CA,  
330 USA; [www.graphpad.com](http://www.graphpad.com)) software. One-way ANOVA with Tukey's multiple comparison test  
331 was used for *in vitro* and *in vivo* BLI and CNR data analysis. An unpaired one-tailed *t*-test was  
332 used to analyze the increase in CNR for PC3-HITI day 11 vs day 46 tumours.

333

### 334 **Results**

#### 335 CRISPR/Cas9 engineering of multiple human cell types with tri-modal reporter gene minicircle 336 donors

337 In this study, we designed our trimodal reporter gene system in MC constructs to reduce the size  
338 and immunogenicity of our donor DNA and to remove antibiotic resistance genes. To compare  
339 the efficiency of HDR vs HITI editing at the AAVS1 site, we designed two donor and two Cas9-  
340 expressing MCs, as shown in Figure 1B. The HDR and HITI constructs were engineered to  
341 express tdTomato (*tdT*), firefly luciferase (*Fluc2*) and rat organic anion transporting polypeptide  
342 1a1 (*Oatp1a1*) genes under the control of an *EF1 $\alpha$*  promoter and 2A self cleaving peptide system  
343 (Figure 1B). The HDR and HITI parental plasmids initially measured 11.9 kb and 10.4 kb in  
344 size, which was then reduced to 7.9 kb and 6.4 kb when recombined into MCs, respectively, as  
345 confirmed by agarose gel electrophoresis (Figure 1C). The HDR-MC was flanked by left and  
346 right AAVS1 homologous arms either side of the AAVS1 genomic cut site, whereas the HITI  
347 donor contained the same CRISPR/Cas9 cut site as the AAVS1 genomic site (Supp. Figure 1). In  
348 this instance, if the MC DNA inserted into the correct orientation at the AAVS1 site, the  
349 CRISPR/Cas9 cut sites would be lost and the trimodal reporter genes would be stably integrated  
350 into the genome (Supp. Figure 1). The Cas9 expressing MCs were designed to contain the  
351 necessary RNA scaffolding and gRNA sequences targeting the AAVS1 site or a scrambled  
352 gRNA control, alongside a zsGreen (*zsG*) fluorescent reporter gene (Figure 1B). Both the pCas9-  
353 AAVS1-MC and pCas9-scrambled-MC constructs measured 12.5kb in parental plasmid form,  
354 and 8.6kb in MC form (Figure 1B).

355

356 Our first objective was to determine the correct integration of our donor MCs in three human cell  
357 lines; HEK 293T, HeLa and PC3 cells. All 3 cell lines were co-transfected with the HDR-MC  
358 or HITI-MC together with either the Cas9-AAVS1-MC or Cas9-scrambled-MC (as outlined in  
359 Figure 1D) and grown for 48hrs. The cells were then FACS sorted for tdT+/zsG+ cells in order to  
360 purify cells that were successfully co-transfected, and tdT fluorescence was then tracked every 7  
361 days using flow cytometry (Supp. Figure 2A-B). In two separate experimental groups, the cells  
362 were then resorted 14 or 21 days later for tdT+/zsG- cells, to ensure that the cell populations had  
363 not randomly integrated the Cas9-zsG MCs into the genome (Supp. Figure 2C). Both PC3  
364 experimental groups were resorted 14 days after the initial sort (and not 21 days later) due to  
365 lower transfection rates. However, resorting the cells 14 or 21 days later had a negligible effect  
366 on tdT+ cell populations across the timepoints. For almost all cell types there was a higher  
367 percentage of tdT+ fluorescence cells at endpoint in the HITI-AAVS1 groups (pink shading,  
368 Supp. Figure 2C), suggesting better or more stable integration compared to HDR-AAVS1  
369 groups.

370

#### 371 Mixed cell population (MCP) integration and BLI analysis

372 We next performed junctional PCR analysis on extracted DNA samples to determine whether the  
373 tdT+ MCPs had correctly incorporated the large, trimodal donor MCs into the AAVS1 site in the  
374 right orientation (Supp. Figure 3A). A correct integration band (1.4 kb) was detected for all  
375 HITI-guideAAVS1 (HITIgA) engineered cells (very low transfection efficiency for PC3 cells  
376 may explain why the integration band was weak) as well as a correct integration band (1.3 kb)  
377 for HDR-guideAAVS1 (HDRgA) cells for 293T and HeLa MCPs. There were no integration  
378 bands for the control naïve cells or cells engineered with scramble guide RNA (HITI/HDRgS).  
379 Next, we performed *in vitro* BLI experiments to determine if the integrated reporter gene was  
380 functioning in the MCPs. Varying numbers of each cell type were imaged with BLI after  
381 addition of D-luciferin to visualize *FLuc2* expression (Suppl Figure 3B). In all cell types, there  
382 was a positive correlation between BLI signal and cell number and, interestingly, a consistently  
383 higher signal was seen in all cell types engineered with HITI-guideAAVS1 compared with HDR-  
384 guideAAVS1.

385

386 HITI is more efficient than HDR in clonal populations

387 Next, we used clonal cell isolation to determine whether HITI or HDR was more efficient at  
388 correctly integrating our large donor MCs at the AVVS1 site. Single cell tdT<sup>+</sup> clones were  
389 isolated from the 293T and PC3 MCPs into 96-well plates during a third FAC sort. We decided  
390 to use the 293T cells as a proof-of-principle cell line and the PC3 cells as a relevant prostate  
391 cancer model cell line, hence the HeLa cells were not included in studies from this point  
392 onwards. PCR integration checks were performed on the 293T and PC3 clonal populations to  
393 determine the efficiency of HITI- vs HDR-mediated reporter gene integration at the AAVS1 site  
394 (Figure 2A-B). The number of 293T clonal populations with correct integration was 11.8%  
395 (4/34) for HDR-AAVS1 engineered cells and 36.1% (13/36) for HITI-AAVS1 clones (Figure  
396 2A-B). PC3 cells grew fewer colonies but showed zero integration at the AAVS1 site for tdT<sup>+</sup>  
397 HDR engineered cells (0/14), whereas 10.5% (2/19) of the HITI engineered colonies had correct  
398 reporter gene integration, indicating that HITI was more efficient in both cell types.

399

400 *In vitro* reporter gene imaging

401 Next, we expanded single 293T and PC3 clonal populations that had correct integration bands  
402 for further *in vitro* reporter gene functionality testing. Firstly, we confirmed tdT fluorescence for  
403 both the 293T-HITI (Figure 3A) and PC3-HITI (Figure 3G) clones via fluorescence microscopy.  
404 In addition, there was a positive correlation between BLI signal and increasing cell number for  
405 293T (Figure 3B-C;  $r^2=0.9718$ ) and PC3 (Figure 3H-I;  $r^2=0.9897$ ) cells. BLI signal measured  
406 over several passages showed stable FLuc2 expression over time for both clonal cell lines  
407 (Figure 3D and J). To test for Oatp1a1 functionality, 293T naïve, 293-HITI, PC3 naïve and PC3-  
408 HITI cells were incubated with or without Gd-EOB-DTPA (6.4 mM) in normal media for 90  
409 minutes, washed thoroughly, and pelleted before inserting into an agarose phantom. Inversion  
410 recovery MRI was performed at 3 Tesla and 37°C, and spin-lattice relaxation rate ( $R_1$ ) maps  
411 were generated (Figure 3E, K). Neither the naïve 293T/PC3 or untreated 293T-HITI and PC3-  
412 HITI cell populations exhibited any change in  $R_1$  rates (Figure 3F, L). Only HITI clones  
413 expressing Oatp1a1 had significantly increased  $R_1$  rates after Gd-EOB-DTPA incubation, with  
414 ~10-fold increase for 293T-HITI cells ( $7.952 \pm 0.87 \text{ s}^{-1}$ ) compared with naïve, treated controls  
415 ( $0.806 \pm 0.038 \text{ s}^{-1}$ ;  $n = 3$ ,  $P < 0.001$ ; Figure 3F) and ~5-fold increase for PC3-HITI cells ( $3.426 \pm$

416  $0.217 \text{ s}^{-1}$ ) compared with naïve, treated controls ( $0.6402 \pm 0.045 \text{ s}^{-1}$ ;  $n = 3$ ,  $P < 0.001$ ; Figure  
417 3L).

418

#### 419 Oatp1a1 sensitivity *in vivo*

420 To investigate the MR detection limit of Oatp1a1-expressing cells we injected various  
421 combinations of PC3-naïve and PC3-HITI cells at five sites subcutaneously on the backs of nude  
422 mice (Figure 4 and Supp. Figure 4). A total of  $3 \times 10^6$  cells were injected per site with the  
423 following number of PC3-HITI cells: 1 – 0 (naïve cell only control); 2 –  $10^4$ ; 3 –  $10^5$ ; 4 –  $10^6$ ; 5 –  
424  $3 \times 10^6$  (HITI cell only control). Naïve cells were included with HITI cells so that each injection  
425 contained a total of  $3 \times 10^6$ /site. BLI signal intensity increased as PC3-HITI cell numbers  
426 increased (representative mouse shown in Figure 4A), with  $10^6$  and  $3 \times 10^6$  HITI injections  
427 showing significant signal increase above naïve background controls (Figure 4B). Transverse  
428 MR images from the same mouse showed positive contrast at both the  $10^6$  and  $3 \times 10^6$  HITI  
429 injection sites 5 hours after Gd-EOB-DTPA injection (Figure 4C). Similar to the BLI data, these  
430 sites also exhibited significantly higher contrast-to-noise ratios (CNR) than naïve controls  
431 (Figure 4D). The  $10^4$  and  $10^5$  PC3-HITI injections were difficult to visualize on MRI, had no  
432 discernible positive contrast and were, therefore, not measured. These data were consistent  
433 across all three mice (see Supp. Figure 4) and showed that the very minimum number of  
434 Oatp1a1-expressing cells we could detect with Gd-EOB-DTPA-based MR contrast was  $10^6$  cells  
435 in a  $50 \mu\text{l}$  injection volume.

436

#### 437 PC3-HITI Oatp1a1 tumour models for MRI detection

438 As a proof-of-principle that our HITI-engineered cells could show Gd-EOB-DTPA induced  
439 positive MRI contrast in subcutaneous tumours, we injected 293T-naïve and 293T-HITI cells on  
440 either flank of a nude mouse (Supp. Figure 5). For both cell types, the large masses were visible  
441 on pre-contrast images but also showed noticeable positive contrast 20 minutes post-Gd-EOB-  
442 DTPA injection. However, 5 hours post-contrast, the naïve tumour had returned to pre-contrast  
443 background levels, whereas the HITI tumour had very prominent positive contrast that also  
444 showed heterogeneity within the tumour mass (Supp. Figure 5), similarly to what we reported  
445 previously<sup>43</sup>.

446

447 Moving into a more relevant cancer model, we next injected PC3-naïve and PC3-HITI clonal  
448 cells subcutaneously on either flank of nude mice and followed BLI development over time  
449 (Figure 5). After only 11 days post-injection, before the tumours were visible or palpable, clear  
450 positive contrast was observed for HITI engineered cells 5 hours after Gd-EOB-DTPA injection  
451 (Figure 5A and Supp. Figure 6). The same mice were then imaged at day 46 where the naïve  
452 tumour was visible due to pooled Gd-EOB-DTPA after 20 minutes post-contrast injection. In a  
453 similar fashion 5 hours post contrast, only the HITI engineered cells retained the Gd agent and  
454 showed bright, positive contrast (Figure 5B and Supp. Figure 7). Quantification of CNR over  
455 time showed a significant increase for the HITI tumours (Figure 5C). These data suggest that the  
456 Oatp1a1 MRI reporter can detect tumour burden at stages where the tumours are not visible or  
457 palpable and tumour growth can be tracked longitudinally with Gd-EOB-DTPA-enhanced MRI.  
458

459 Finally, PC3-HITI cells were injected via the tail vein into NSG mice to investigate the ability of  
460 Oatp1a1 as a reporter gene for visualizing metastases (Figure 6). Using BLI as a guide, we were  
461 able to detect a Gd-EOB-DTPA-enhanced metastatic tumour in the liver of one mouse (Figure  
462 6A). In this case, it was evident that a shadow in the liver (as seen in the pre-contrast MR image)  
463 was likely the tumour, which the post-contrast image confirmed. However, in another mouse that  
464 had BLI signal in the head region, a cluster of smaller PC3-HITI tumours was only identifiable  
465 in post-contrast images (Figure 6B), indicating the usefulness of this reporter gene for detecting  
466 metastatic burden with contrast-enhanced MRI.

467

## 468 **Discussion**

469 As personalized medicine and CRISPR-editing become a reality in the clinic, there is a greater  
470 need to 1) improve the efficiency, efficacy and safety of genetically engineered cell-therapies,  
471 and 2) improve our understanding of disease progression and treatment response in preclinical  
472 models of disease. Reporter gene-based imaging allows us to track the location, viability, growth  
473 and efficacy of such treatments, and in preclinical models of cancer progression and treatment. In  
474 this study, we have developed a non-viral vector-based engineering system for large DNA  
475 multimodality reporter gene integration into the AAVS1 safe-harbour genomic locus. To  
476 improve safety further, we utilized MCs as the DNA vector of choice, which eliminates bacterial  
477 DNA contamination and antibiotic resistance genes. In addition, we showed that utilizing the



478 non-homologous end joining (NHEJ) repair pathway with HITI could improve DNA editing  
479 efficiency in human cells compared to the more commonly used HDR pathway. Finally, building  
480 off our previous work<sup>32</sup>, we have engineered a trimodality reporter gene construct that contains a  
481 clinically relevant MRI reporter, *Oatp1a1*, in addition to fluorescent and bioluminescent genes  
482 which enabled cell sorting and non-invasive BLI/MRI of engineered cells in a pre-clinical cancer  
483 model.

484  
485 One of the major limitations of engineering cells with large, multimodality reporter gene DNA  
486 plasmids is the reduced efficiency of both transfection and gene editing with increasing  
487 construct/insert size<sup>45-47</sup>. In addition, the presence of bacterial and antibiotic resistance genes in  
488 parental plasmids has the potential to exert immunological responses and raises safety concerns.  
489 To circumvent these issues, we designed our study to use MCs, which removes the bacterial  
490 backbone from parental plasmids and thus reduces the size of the DNA donor constructs. Using  
491 MCs instead of parental plasmids allowed us to remove ~4 kb of unwanted DNA from our HDR  
492 construct, with a further reduction of ~1.5 kb for the HITI MC when the homologous arm  
493 sequences were replaced with a 20 bp gRNA sequence (saving a total of ~5.5 kb). These large-  
494 scale reductions thus provided us with room to upgrade our dual-modality *tdTomato* and *FLuc2*  
495 reporter gene construct we previously reported<sup>32</sup> to a trimodality reporter gene construct with the  
496 addition of the *Oatp1a1* MRI reporter<sup>42,43</sup>. To improve safety and translatability we also removed  
497 the puromycin resistance gene to reduce the MC size by a further 600 bp and utilized FACS of  
498 tdTomato positive cells to obtain mixed and clonal cell populations instead of antibiotic  
499 selection. Our final step for improving safety was to design our system to target a “safe harbour”  
500 locus in genomic DNA. Several of these loci have now been reported in the literature<sup>48</sup> and are  
501 described as sites where inserted genetic elements can function as intended, without causing  
502 alterations that would pose a risk to the host cell or organism<sup>23</sup>. For this study we targeted the  
503 AAVS1 site found within the human Protein Phosphatase 1 Regulatory Subunit 12C gene as this  
504 has been one of the best characterized, to date. No known side effects are associated with  
505 disrupting the PP1R12C gene, however it has been reported that mechanisms such as DNA  
506 methylation can silence transgenes targeted to this genomic region<sup>49</sup>. Since our studies rely on  
507 stable reporter gene expression over time for accurate cell detection and proliferation, we  
508 investigated whether reporter gene expression in our AAVS1 engineered 293T-HITI and PC3-

509 HITI cell populations changed over time. We found that BLI signal was stable over several  
510 passages and tdT fluorescence was consistently expressed in both cell lines, indicating consistent  
511 transgene expression.

512

513 We have shown here that HITI-based CRISPR/Cas9 cell engineering is more efficient than the  
514 more commonly used HDR method for integrating large DNA donor constructs into the genome  
515 for stable expression. Targeted transgene integration is typically achieved using homologous  
516 arms and the HDR pathway, however, this mechanism is highly inefficient and is not usually  
517 active in non-dividing cells<sup>33</sup>. Indeed, our previous study showed only 3.8% of selected cells  
518 were correctly edited using the HDR mechanism<sup>32</sup>. In contrast, the HITI method which utilizes  
519 the NHEJ pathway is active in all stages of the cell cycle and in quiescent cells<sup>36</sup>, and thus has  
520 been used to improve editing efficiency. Using the method described by Suzuki *et al.*<sup>38</sup>, our  
521 engineered 293T and PC3 clonal cell populations did indeed have greater DNA integration at the  
522 AAVS1 site compared with HDR (36% and 12% for HITI vs 10.5% and 0% for HDR,  
523 respectively). However, it is important to note that the NHEJ repair pathway is error prone and  
524 often leads to insertions and deletions (indels) at the DNA junctions. Consequently, this  
525 mechanism is often taken advantage of to produce DNA disruptions, gene silencing and knock-  
526 outs. These issues would need to be considered if using the HITI method for correctional DNA  
527 editing and promoter-less vector integration, since these require specific DNA sequences, either  
528 upstream or downstream, to be preserved. In this case, we engineered cells with the only  
529 requirements being that the transgene inserts into the AAVS1 site (confirmed with junctional  
530 PCR) and that the reporter genes are consistently expressed (confirmed with imaging).  
531 Therefore, indels at either the 5' or 3' junction would likely have a negligible impact on our  
532 experiments.

533

534 Although we confirmed correct transgene integration at the AAVS1 site in our study, we cannot  
535 rule out integration at other off-target sites in HITI and HDR engineered populations. Several  
536 293T and PC3 single-cell clonal populations expressed the *tdTomato* fluorescence reporter gene  
537 but did not show integration bands for the AAVS1 site. Evidence suggests that CRISPR/Cas9 is  
538 not 100% accurate and off-target effects have been reported<sup>50,51</sup>, thus, it is possible that the MCs  
539 integrated into off-target Cas9 cut sites. However, it is also plausible, and probably more likely,

540 that the MCs inserted into the AAVS1 site in the wrong direction. Even though HITI is designed  
541 to minimize integration in the wrong orientation, the error-prone NHEJ repair mechanism of  
542 blunt-ended DNA breaks could lead to indels at the CRISPR/Cas9 cut site boundaries, which  
543 could then disrupt the ability of Cas9 to recognize and re-cut those sites. The likelihood of indel  
544 formation using Cas9 HITI could be reduced in future studies by adopting a similar method to  
545 that recently reported by Li and colleagues<sup>52</sup>. In that study, the authors utilize Cas12a, which  
546 leaves 5 bp overhangs, to precisely edit the genome in a process coined microhomology-  
547 dependent targeted integration (MITI)<sup>52</sup>. Independently of CRISPR, MCs, like plasmids, can also  
548 randomly integrate into the genome of cells, albeit at very low rates. Future work will need to  
549 analyze the rate of off-target integrations and possible indel disruptions at the CRISPR/Cas9 cut  
550 sites using techniques, such as next generation sequencing, to determine the full safety profile of  
551 HITI at safe harbour loci. To improve targeting specificity, studies have shown that high-fidelity  
552 Cas9 enzymes in ribonucleoprotein complexes (RNPs), instead of Cas9 DNA vectors, improve  
553 on-target activity, while reducing off-target editing<sup>53,54</sup>. In combination with RNPs, adeno-  
554 associated viruses (AAVs) are now commonly used as DNA donors for CRISPR experiments  
555 due to their high transduction capabilities in hard-to-transfect cell lines, their low risk of random  
556 integration and reduced immunogenic response. However, AAVs are still limited by their  
557 loading capacity of ~4.5 kb, which would be a problem for large, multimodality imaging vectors  
558 as presented here, but conceivable for future studies where only one imaging reporter gene is  
559 required. With these emerging technologies, it is likely that CRISPR gene editing will become  
560 highly specific and thus safer in the near future.

561  
562 We engineered cells with a multimodality reporter gene construct to enable us to go from single  
563 cell, optical imaging methods (FLI) to higher sensitivity whole-animal planar imaging (BLI) and  
564 superior 3D high-resolution tomographic imaging (MRI) in animals. This offers several  
565 advantages. Firstly, fluorescently activated cell sorting of tdTomato-expressing cells improves  
566 upon our previous study by eliminating the need for an antibiotic resistance selection gene,  
567 which constitutes a safety risk and has been associated with structural plasmid instabilities<sup>55</sup>.  
568 Secondly, the firefly luciferase gene (*FLuc2*), in combination with its substrate D-luciferin,  
569 allowed us to directly visualize engineered cells *in vivo* using BLI. Inclusion of bioluminescent  
570 genes in preclinical cancer models is a relatively inexpensive and valuable tool that also allows

571 one to track cell migration and cell seeding in metastatic cancer models, assess cell viability and  
572 follow cell/tumour growth longitudinally<sup>14</sup>. A limitation of BLI is that it is restricted to small  
573 animal models of disease. However, it is useful for determining sites of cell  
574 arrest/seeding/growth and thus can be used in conjunction with other reporter genes as a guide  
575 for determining when and where to perform relatively more expensive, higher resolution clinical  
576 imaging, such as MRI<sup>13</sup>. To build off our previous dual FLI-BLI study<sup>32</sup>, we decided to include  
577 the MRI reporter gene, *Oatp1a1*, as a translationally relevant and sensitive reporter gene to  
578 complete our trimodality construct for HITI-based CRISPR engineering. First described by  
579 Patrick *et al.*<sup>42</sup>, *Oatp1a1* selectively, but reversibly, uptakes the clinically approved Gd<sup>3+</sup> contrast  
580 agent Gd-EOB-DTPA and thus provides positive contrast in  $T_1$ -weighted MR images. The  
581 authors concluded, therefore, that *Oatp1a1* engineered cells and tumours should be easier to  
582 detect than the negative contrast generated by  $T_2$ -agents, such as such as superparamagnetic iron  
583 oxide (SPIO) and ferromagnetic agents<sup>42,56</sup>. In addition, engineering cells with integrated  
584 *Oatp1a1* expression means that MR images can be obtained longitudinally to track cell migration  
585 and growth, and signal intensity can be directly correlated with cell viability. Finally, we and  
586 others have found that *Oatp1a1* also enhances the uptake of the firefly luciferase substrate D-  
587 luciferin for BLI<sup>43,57</sup> and the fluorescent dye indocyanine green (using the human ortholog  
588 *OATP1B3*) for both fluorescent<sup>58</sup> and photoacoustic imaging<sup>59</sup>, which gives an added advantage  
589 of using *Oatp1* for multi-modality imaging. Since we, and others, have now shown that the  
590 human *OATP1B3* gene also functions as a useful fluorescent, photoacoustic and MRI reporter  
591 gene, *in vivo*<sup>58,59</sup>, future studies will focus on exchanging *Oatp1a1* for the more translationally  
592 favourable *OATP1B3* ortholog.

593  
594 The improved safety profile and expression of multimodal reporter genes proposed here could  
595 have several uses in cell engineering, or at least help answer several concerns with *in vivo* cell  
596 therapies. For example, the U.S. Food and Drug Administration have listed potential safety  
597 concerns related to unproven stem cell therapies<sup>60</sup>, including: 1) the ability of cells to move from  
598 placement sites and change into inappropriate cell types or multiply; 2) failure of cells to work as  
599 expected, and 3) the growth of tumours. In addition, the long-term safety profiles of cells  
600 engineered with randomly-integrating viruses still require further investigation and optimization.  
601 These are concerns that could be addressed by targeting non-viral DNA vectors, such as MCs, to

602 specific safe-harbour loci, such as AAVS1, and reducing the use of integrating viruses.  
603 Incorporating reporter genes for clinical grade imaging will also help improve patient safety by  
604 allowing one to track cellular therapies *in vivo* (such as for stem cells and immunotherapies).  
605 Clinicians could then determine whether the therapeutic cells are localizing to the correct  
606 anatomical feature, such as a solid tumour<sup>18</sup>, or to determine their persistence and viability for  
607 short- and long-term treatment strategies. Future work will focus on evaluating our system in  
608 stem cells and other clinically relevant cell types. Translation will also need to consider building  
609 donor vectors that lack optical reporter genes and utilize other selection methods (e.g., magnetic  
610 sorting). It is easily feasible to switch out genes from our trimodality construct for other imaging  
611 purposes, such as replacing *FLuc2* with a PET reporter gene for dual PET-MR imaging. Suicide  
612 switch genes could also be incorporated to further improve safety by killing the engineered cells  
613 in cases where they become oncogenic<sup>61</sup>, for example. Not only are these tools useful for clinical  
614 cell-based therapies, they are also extremely useful in pre-clinical studies for investigating cancer  
615 progression/aggression, metastatic burden and treatment strategies. Avoiding the use of random-  
616 integrating viruses and targeted editing should also help reduce off-target effects of gene-editing  
617 that may alter the normal characteristics of the cell type being studied.

## 618 **Conclusion**

620 Our work demonstrates the first CRISPR/Cas9 HITI MC system for safe harbor integration of a  
621 large donor construct encoding three reporter genes for multi-modal longitudinal imaging of cells  
622 *in vivo*. We have shown that inclusion of the translationally relevant MR reporter gene, *Oatp1a1*,  
623 can enable localization and tracking of small primary and metastatic tumours that are not readily  
624 detectable visually or in pre-contrast MR images. This work lays the foundation for an effective  
625 and safer genome editing tool for non-invasive reporter gene tracking of multiple cell types *in*  
626  *vivo*, such as for cell-based cancer immunotherapies and stem cell treatments.

## 627 **Author Contributions**

629 J.A.R. designed the project, J.A.R, J.J.K. and M.S.M. designed the experiments. J.J.K. directed  
630 the study and with M.S.M. carried out most of the experiments. N.N.N. developed the methods  
631 for *Oatp1a1* MRI. Y.C. helped perform MRI. M.M.E. analyzed MRI data. A.J.H. helped develop

632 the parental plasmids. J.J.K. wrote the manuscript with help from M.S.M., which J.A.R.  
633 reviewed and edited.

634

### 635 **Acknowledgements**

636 The authors thank Dr. Kevin Brindle (University of Cambridge) for providing the Oatp1a1  
637 plasmid, Dr. Kristin Chadwick for FACS and flow cytometry help and David Reese for MRI  
638 troubleshooting.

639

### 640 **Competing Interests**

641 The authors declare that they have no competing interests.

642

### 643 **Funding**

644 This work was funded by a Canadian Institutes of Health Research (CIHR) Project Grant (Grant#  
645 377071; JAR), a Natural Sciences and Engineering Research Council (NSERC) Discovery Grant  
646 (Grant# RGPIN-2016-05420; JAR), and a University of Western Ontario Strategic Support for  
647 CIHR Success Seed Grant (JAR).

648

649 **References**

650

651 1. Brader, P., Serganova, I. & Blasberg, R. G. Noninvasive molecular imaging using reporter  
652 genes. *Journal of Nuclear Medicine* **54**, 167–172 (2013).

653 2. Kircher, M. F., Gambhir, S. S. & Grimm, J. Noninvasive cell-tracking methods. *Nat. Rev.*  
654 *Clin. Oncol.* **8**, 677–688 (2011).

655 3. Prescher, J. A. & Contag, C. H. Guided by the light: visualizing biomolecular processes in  
656 living animals with bioluminescence. *Current Opinion in Chemical Biology* **14**, 80–89  
657 (2010).

658 4. Hong, H., Yang, Y. & Cai, W. Imaging gene expression in live cells and tissues. *Cold*  
659 *Spring Harb. Protoc.* **6**, (2011).

660 5. Kim, J. E., Kalimuthu, S. & Ahn, B. C. In Vivo Cell Tracking with Bioluminescence  
661 Imaging. *Nucl. Med. Mol. Imaging (2010)*. **49**, 3–10 (2015).

662 6. Li, M., Wang, Y., Liu, M. & Lan, X. Multimodality reporter gene imaging: Construction  
663 strategies and application. *Theranostics* **8**, 2954–2973 (2018).

664 7. Gilad, A. A. & Shapiro, M. G. Molecular Imaging in Synthetic Biology, and Synthetic  
665 Biology in Molecular Imaging. *Mol. Imaging Biol.* **19**, 373–378 (2017).

666 8. Joo, H. K. & Chung, J. K. Molecular-genetic imaging based on reporter gene expression.  
667 *J. Nucl. Med.* **49**, 164–180 (2008).

668 9. Reagan, M. R. & Kaplan, D. L. Concise Review: Mesenchymal Stem Cell Tumor-  
669 Homing: Detection Methods in Disease Model Systems. *Stem Cells* **29**, 920–927 (2011).

670 10. Wang, H. *et al.* Trafficking Mesenchymal Stem Cell Engraftment and Differentiation in  
671 Tumor-Bearing Mice by Bioluminescence Imaging. *Stem Cells* **27**, 1548–1558 (2009).

672 11. Kidd, S. *et al.* Direct evidence of mesenchymal stem cell tropism for tumor and wounding  
673 microenvironments using in vivo bioluminescent imaging. *Stem Cells* **27**, 2614–2623  
674 (2009).

675 12. Hamilton, A. M., Parkins, K. M., Murrell, D. H., Ronald, J. A. & Foster, P. J.  
676 Investigating the Impact of a Primary Tumor on Metastasis and Dormancy Using MRI:  
677 New Insights into the Mechanism of Concomitant Tumor Resistance. *Tomography* **2**, 79–  
678 84 (2016).

679 13. Parkins, K. M. *et al.* Multimodality cellular and molecular imaging of concomitant tumour  
680 enhancement in a syngeneic mouse model of breast cancer metastasis. *Sci. Rep.* **8**, (2018).

- 681 14. Parkins, K. M. *et al.* A multimodality imaging model to track viable breast cancer cells  
682 from single arrest to metastasis in the mouse brain. *Sci. Rep.* **6**, (2016).
- 683 15. Vandergaast, R. *et al.* Enhanced noninvasive imaging of oncology models using the NIS  
684 reporter gene and bioluminescence imaging. *Cancer Gene Therapy* (2019).  
685 doi:10.1038/s41417-019-0081-2
- 686 16. Shah, K., Jacobs, A., Breakefield, X. O. & Weissleder, R. Molecular imaging of gene  
687 therapy for cancer. *Gene Therapy* **11**, 1175–1187 (2004).
- 688 17. Yaghoubi, S. S. *et al.* Noninvasive detection of therapeutic cytolytic T cells with 18 F-  
689 FHBG PET in a patient with glioma. *Nat. Clin. Pract. Oncol.* **6**, 53–58 (2009).
- 690 18. Keu, K. V. *et al.* Reporter gene imaging of targeted T cell immunotherapy in recurrent  
691 glioma. *Sci. Transl. Med.* **9**, (2017).
- 692 19. Milone, M. C. & O’Doherty, U. Clinical use of lentiviral vectors. *Leukemia* **32**, 1529–  
693 1541 (2018).
- 694 20. Hacein-Bey-Abina, S. *et al.* Insertional oncogenesis in 4 patients after retrovirus-mediated  
695 gene therapy of SCID-X1. *J. Clin. Invest.* **118**, 3132–3142 (2008).
- 696 21. Howe, S. J. *et al.* Insertional mutagenesis combined with acquired somatic mutations  
697 causes leukemogenesis following gene therapy of SCID-X1 patients. *J. Clin. Invest.* **118**,  
698 3143–3150 (2008).
- 699 22. Hacein-Bey-Abina, S. *et al.* LMO2-Associated Clonal T Cell Proliferation in Two Patients  
700 after Gene Therapy for SCID-X1. *Science (80-. )*. **302**, 415–419 (2003).
- 701 23. Papapetrou, E. P. & Schambach, A. Gene Insertion Into Genomic Safe Harbors for Human  
702 Gene Therapy. *Mol. Ther.* **24**, 678–684 (2016).
- 703 24. Wang, Y. *et al.* Genome editing of human embryonic stem cells and induced pluripotent  
704 stem cells with zinc finger nucleases for cellular imaging. *Circ. Res.* **111**, 1494–1503  
705 (2012).
- 706 25. Luo, Y. *et al.* Stable Enhanced Green Fluorescent Protein Expression After Differentiation  
707 and Transplantation of Reporter Human Induced Pluripotent Stem Cells Generated by  
708 AAVS1 Transcription Activator-Like Effector Nucleases. *Stem Cells Transl. Med.* **3**, 821–  
709 835 (2014).
- 710 26. Cerbini, T. *et al.* Transcription activator-like effector nuclease (TALEN)-mediated  
711 CLYBL targeting enables enhanced transgene expression and one-step generation of dual



- 712 reporter human induced pluripotent stem cell (iPSC) and neural stem cell (NSC) lines.  
713 *PLoS One* **10**, (2015).
- 714 27. Cho, S. W., Kim, S., Kim, J. M. & Kim, J. S. Targeted genome engineering in human cells  
715 with the Cas9 RNA-guided endonuclease. *Nat. Biotechnol.* **31**, 230–232 (2013).
- 716 28. Cong, L. *et al.* Multiplex genome engineering using CRISPR/Cas systems. *Science (80-. )*.  
717 **339**, 819–823 (2013).
- 718 29. Jinek, M. *et al.* RNA-programmed genome editing in human cells. *Elife* **2013**, (2013).
- 719 30. Mali, P. *et al.* RNA-guided human genome engineering via Cas9. *Science (80-. )*. **339**,  
720 823–826 (2013).
- 721 31. Ding, Q. *et al.* Enhanced efficiency of human pluripotent stem cell genome editing  
722 through replacing TALENs with CRISPRs. *Cell Stem Cell* **12**, 393–394 (2013).
- 723 32. Dubois, V. P. *et al.* Safe Harbor Targeted CRISPR-Cas9 Tools for Molecular-Genetic  
724 Imaging of Cells in Living Subjects. *Cris. J.* **1**, 440–449 (2018).
- 725 33. Orthwein, A. *et al.* A mechanism for the suppression of homologous recombination in G1  
726 cells. *Nature* **528**, 422–426 (2015).
- 727 34. Lieber, M. R. The Mechanism of Double-Strand DNA Break Repair by the  
728 Nonhomologous DNA End-Joining Pathway. *Annu. Rev. Biochem.* **79**, 181–211 (2010).
- 729 35. Auer, T. O., Durore, K., De Cian, A., Concordet, J. P. & Del Bene, F. Highly efficient  
730 CRISPR/Cas9-mediated knock-in in zebrafish by homology-independent DNA repair.  
731 *Genome Res.* **24**, 142–153 (2014).
- 732 36. Suzuki, K. & Izpisua Belmonte, J. C. In vivo genome editing via the HITI method as a  
733 tool for gene therapy. *J. Hum. Genet.* **63**, 157–164 (2018).
- 734 37. He, X. *et al.* Knock-in of large reporter genes in human cells via CRISPR/Cas9-induced  
735 homology-dependent and independent DNA repair. *Nucleic Acids Res.* **44**, (2016).
- 736 38. Suzuki, K. *et al.* In vivo genome editing via CRISPR/Cas9 mediated homology-  
737 independent targeted integration. *Nature* **540**, 144–149 (2016).
- 738 39. Wang, T. D., Chen, Y. & Ronald, J. A. A novel approach for assessment of prostate  
739 cancer aggressiveness using survivin-driven tumour-activatable minicircles. *Gene Ther.*  
740 **26**, 177–186 (2019).
- 741 40. Ronald, J. A. *et al.* Development and Validation of Non-Integrative, Self-Limited, and  
742 Replicating Minicircles for Safe Reporter Gene Imaging of Cell-Based Therapies. *PLoS*

- 743 *One* **8**, (2013).
- 744 41. Darquet, A. M., Cameron, B., Wils, P., Scherman, D. & Crouzet, J. A new DNA vehicle  
745 for nonviral gene delivery: Supercoiled minicircle. *Gene Ther.* **4**, 1341–1349 (1997).
- 746 42. Patrick, P. S. *et al.* Dual-modality gene reporter for in vivo imaging. *Proc. Natl. Acad. Sci.*  
747 *U. S. A.* **111**, 415–20 (2014).
- 748 43. Nyström, N. N. *et al.* Longitudinal Visualization of Viable Cancer Cell Intratumoral  
749 Distribution in Mouse Models Using Oatp1a1 -Enhanced Magnetic Resonance Imaging.  
750 *Invest. Radiol.* **54**, 302–311 (2019).
- 751 44. Yushkevich, P. A. *et al.* User-guided 3D active contour segmentation of anatomical  
752 structures: Significantly improved efficiency and reliability. *Neuroimage* **31**, 1116–1128  
753 (2006).
- 754 45. Paix, A. *et al.* Precision genome editing using synthesis-dependent repair of Cas9-induced  
755 DNA breaks. *Proc. Natl. Acad. Sci. U. S. A.* **114**, E10745–E10754 (2017).
- 756 46. Kreiss, P. *et al.* Plasmid DNA size does not affect the physicochemical properties of  
757 lipoplexes but modulates gene transfer efficiency. *Nucleic Acids Res.* **27**, 3792–3798  
758 (1999).
- 759 47. Hornstein, B. D., Roman, D., Arévalo-Soliz, L. M., Engevik, M. A. & Zechiedrich, L.  
760 Effects of circular DNA length on transfection efficiency by electroporation into HeLa  
761 cells. *PLoS One* **11**, (2016).
- 762 48. Pellenz, S. *et al.* New Human Chromosomal Sites with ‘Safe Harbor’ Potential for  
763 Targeted Transgene Insertion. *Hum. Gene Ther.* **30**, 814–828 (2019).
- 764 49. Ordovás, L. *et al.* Efficient recombinase-mediated cassette exchange in hPSCs to study the  
765 hepatocyte lineage reveals AAVS1 locus-mediated transgene inhibition. *Stem Cell Reports*  
766 **5**, 918–931 (2015).
- 767 50. Zhang, X. H., Tee, L. Y., Wang, X. G., Huang, Q. S. & Yang, S. H. Off-target effects in  
768 CRISPR/Cas9-mediated genome engineering. *Molecular Therapy - Nucleic Acids* **4**, e264  
769 (2015).
- 770 51. Wang, D. C. & Wang, X. Off-target genome editing: A new discipline of gene science and  
771 a new class of medicine. *Cell Biology and Toxicology* **35**, 179–183 (2019).
- 772 52. Li, P. *et al.* Cas12a mediates efficient and precise endogenous gene tagging via MITI:  
773 microhomology-dependent targeted integrations. *Cell. Mol. Life Sci.* (2019).

774 doi:10.1007/s00018-019-03396-8

- 775 53. Vakulskas, C. A. *et al.* A high-fidelity Cas9 mutant delivered as a ribonucleoprotein  
776 complex enables efficient gene editing in human hematopoietic stem and progenitor cells.  
777 *Nat. Med.* **24**, 1216–1224 (2018).
- 778 54. Chen, J. S. *et al.* Enhanced proofreading governs CRISPR-Cas9 targeting accuracy.  
779 *Nature* **550**, 407–410 (2017).
- 780 55. Oliveira, P. H. & Mairhofer, J. Marker-free plasmids for biotechnological applications -  
781 implications and perspectives. *Trends in Biotechnology* **31**, 539–547 (2013).
- 782 56. Xiao, Y. D. *et al.* MRI contrast agents: Classification and application (Review).  
783 *International Journal of Molecular Medicine* **38**, 1319–1326 (2016).
- 784 57. Patrick, P. S., Lyons, S. K., Rodrigues, T. B. & Brindle, K. M. Oatp1 Enhances  
785 Bioluminescence by Acting as a Plasma Membrane Transporter for d-luciferin. *Mol.*  
786 *Imaging Biol.* **16**, 626–634 (2014).
- 787 58. Wu, M. R. *et al.* Organic anion-transporting polypeptide 1B3 as a dual reporter gene for  
788 fluorescence and magnetic resonance imaging. *FASEB J.* **32**, 1705–1715 (2018).
- 789 59. Nyström, N. N., Yip, L. C. M., Carson, J. J. L., Scholl, T. J. & Ronald, J. A. Development  
790 of a Human Photoacoustic Imaging Reporter Gene Using the Clinical Dye Indocyanine  
791 Green. *Radiol. Imaging Cancer* **1**, e190035 (2019).
- 792 60. Marks, P. W., Witten, C. M. & Califf, R. M. Clarifying Stem-Cell Therapy’s Benefits and  
793 Risks. *N. Engl. J. Med.* **376**, 1007–1009 (2017).
- 794 61. Ivics, Z. Self-Destruct Genetic Switch to Safeguard iPS Cells. *Molecular Therapy* **23**,  
795 1417–1420 (2015).

796

Figure 1

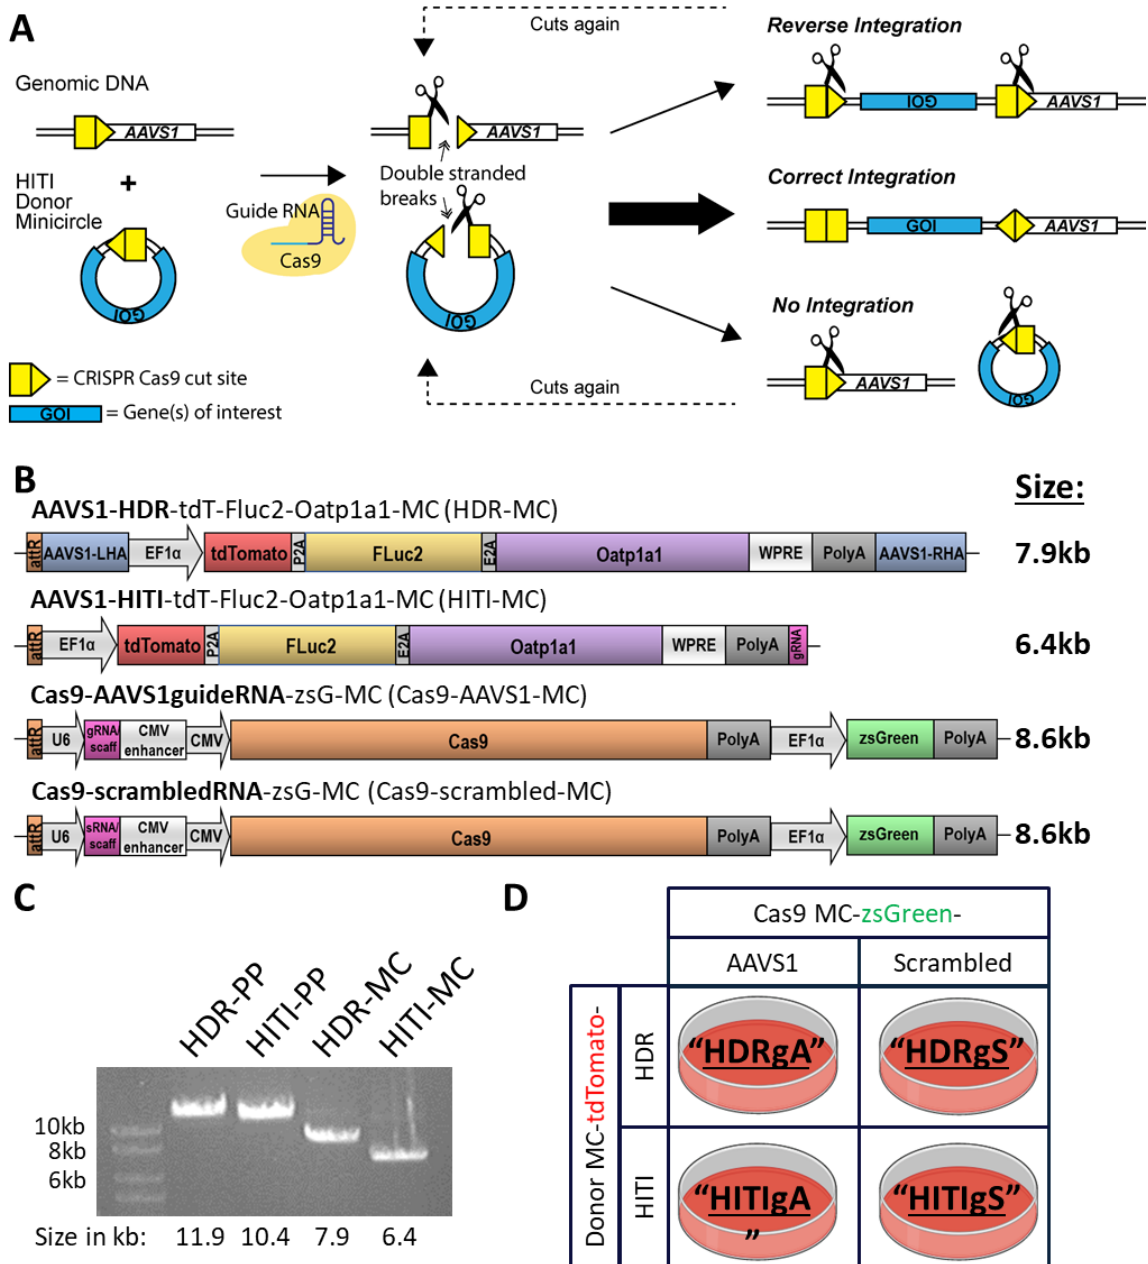

797 Figure 1. Homology-Independent Targeted Integration (HITI) experimental design. *A*, HITI  
 798 minicircles (MCs) contain a Cas9 cut site identical to that at the AAVS1 safe harbor locus. Both  
 799 genomic and MC DNA are cut in the presence of a guide RNA and Cas9. Genes of interest (GOI)  
 800 are only stably integrated into the genome when inserted in the correct orientation, otherwise the  
 801 Cas9 cut sites are preserved, which increases the likelihood of continuous Cas9 cutting. Image  
 802 adapted from Suzuki *et al.*, 2016. *B*, Trimodality HDR, HITI and Cas9 MC constructs designed  
 803 for this study. *C*, Restriction digest agarose gel of parental plasmids (PP) and MCs and indicated  
 804 band sizes. *D*, transfection regimen for combinations of donor and Cas9 MCs and simplified  
 805 abbreviations for each condition.

## Figure 2

### A

#### 293T HDR:

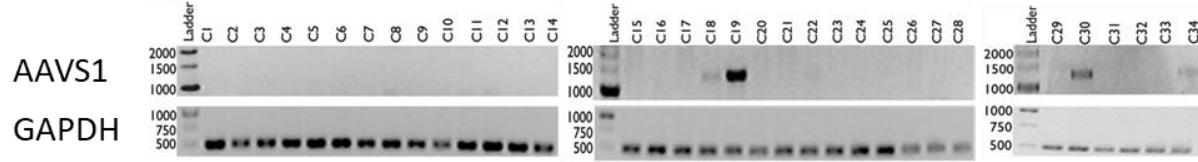

#### 293T HITI:

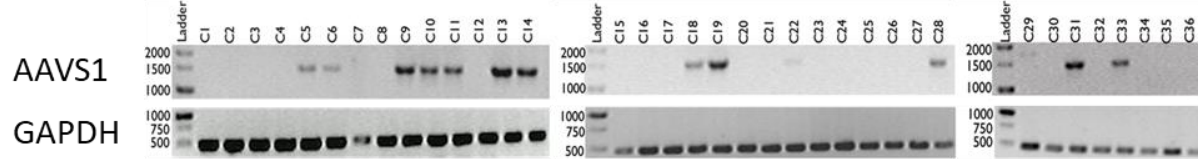

#### PC3 HDR:

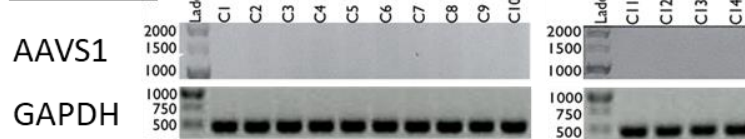

#### PC3 HITI:

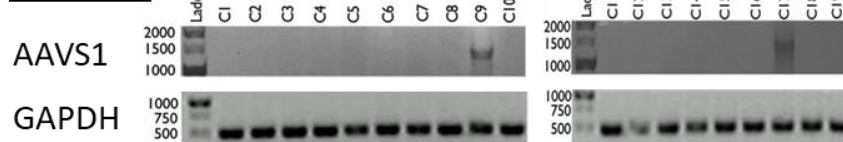

### B

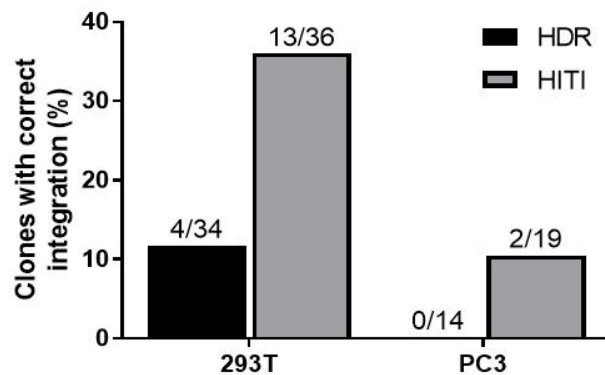

806

807 Figure 2. Junctional PCR integration checks for 293T and PC3 clonal cell populations. *A*, PCR  
808 integration checks at the AAVS1 site. GAPDH was amplified as a DNA loading control. *B*,  
809 Quantification shows a higher number of positive integration clones for HITI engineered cells  
810 compared to HDR for both 293T and PC3 cell lines.

Figure 3

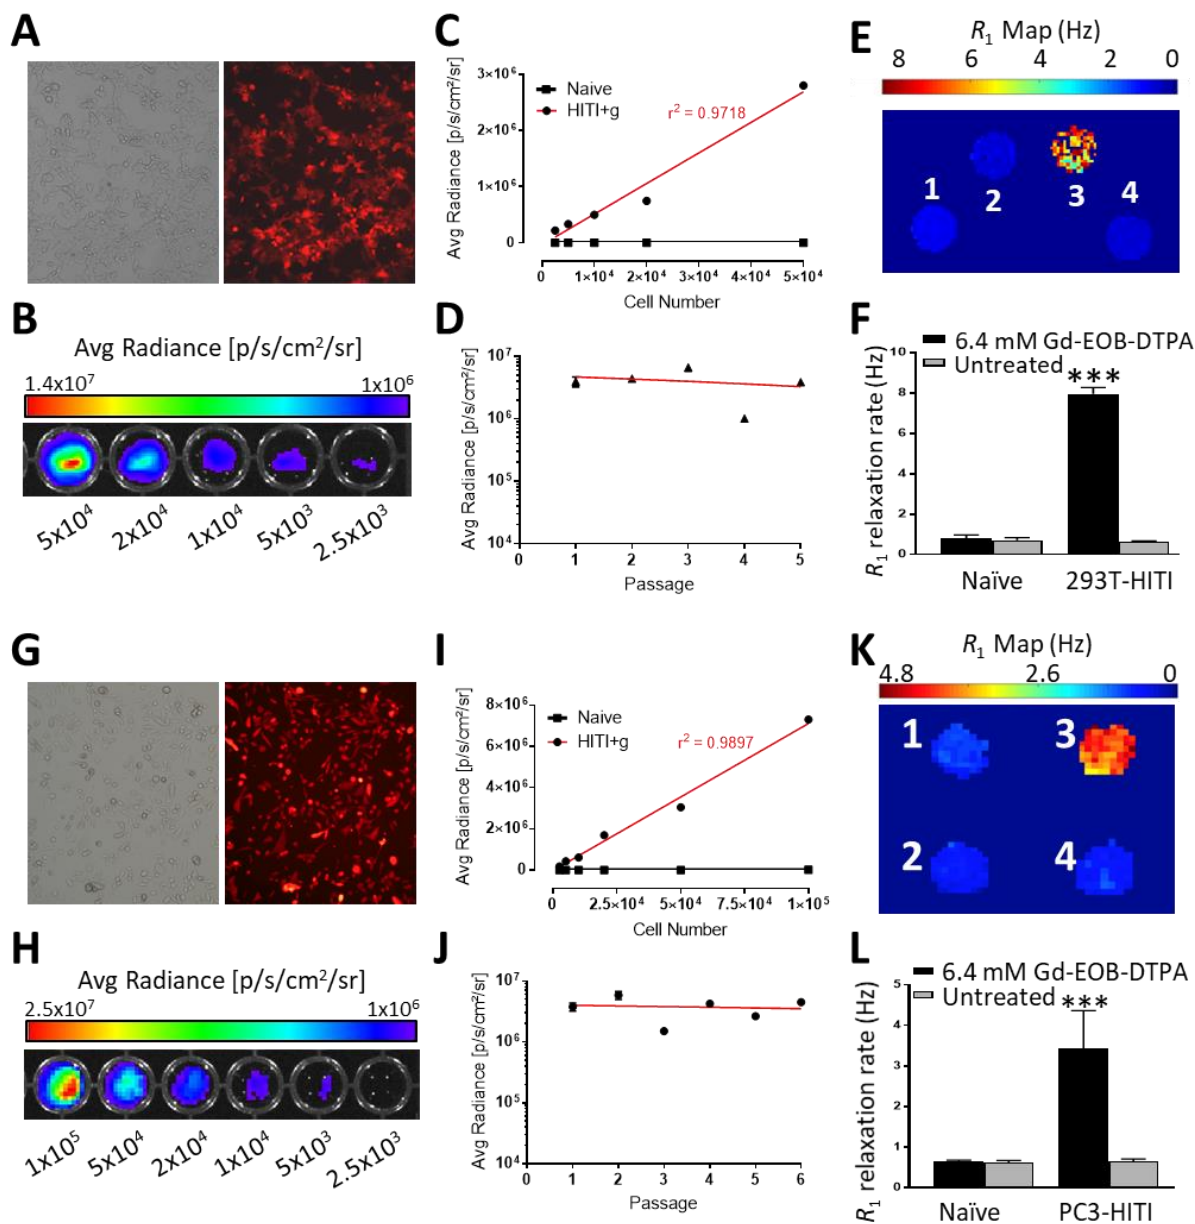

811  
 812 Figure 3. *In vitro* FLI, BLI and MRI characterization of 293T-HITI (A-F) and PC3-HITI (G-L)  
 813 clones. A and G, brightfield and tdT fluorescence. B and H, BLI intensity maps related to cell  
 814 number. C and I, quantification of BLI signal to cell number. D and J, BLI signal over successive  
 815 passages. E and K, Spin-lattice relaxation maps of representative phantoms containing pellets of  
 816 cells untreated or treated with 6.4 mM Gd-EOB-DTPA, as follows: 1, naïve, treated; 2, naïve  
 817 untreated; 3, HITI treated; 4, HITI untreated. F and L, quantification of spin-lattice rates (n = 3,  
 818 \*\*\*  $P < 0.001$ ).

Figure 4

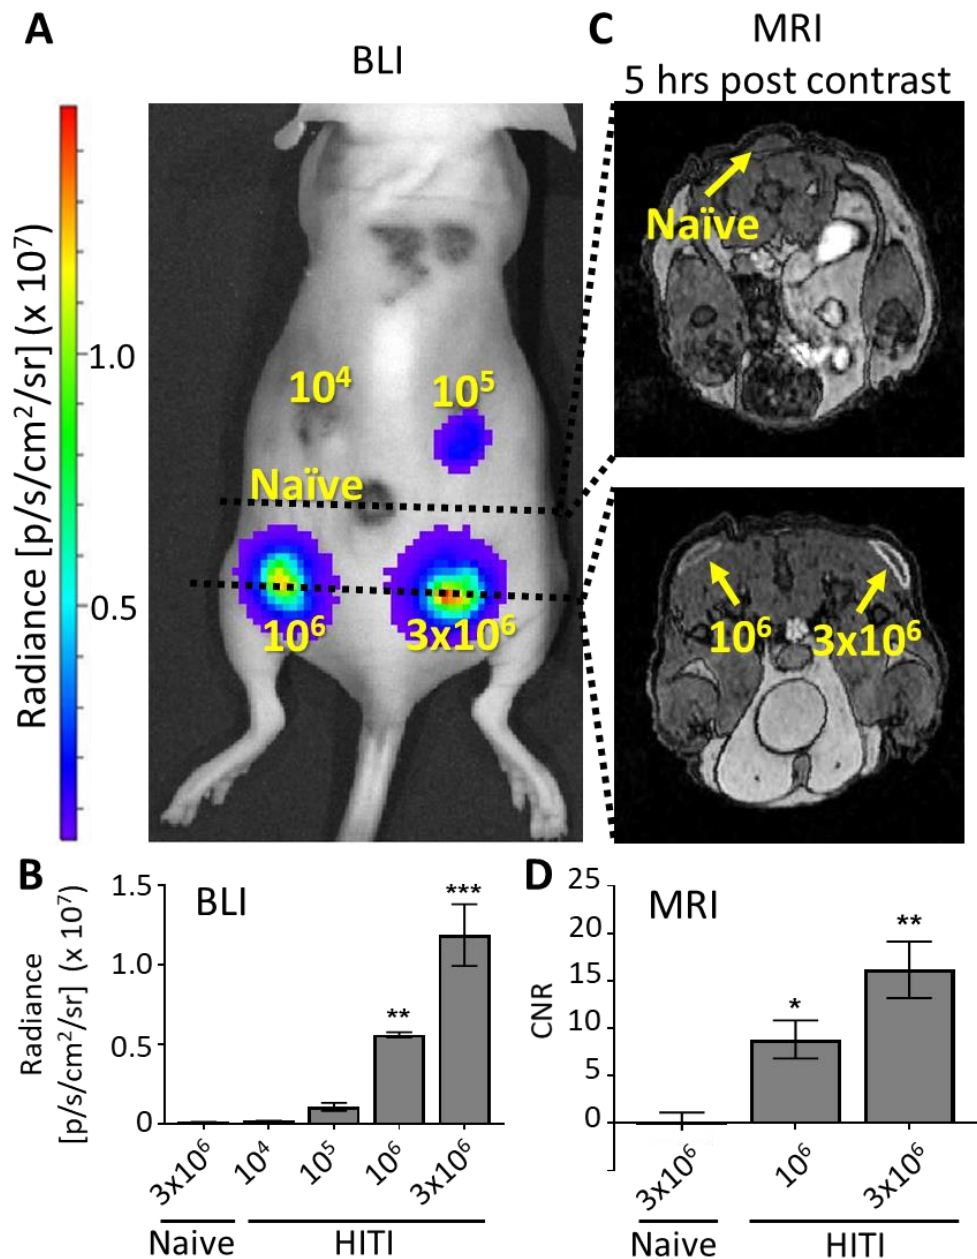

819

820 Figure 4. BLI and Oatp1a1 sensitivity *in vivo*. *A*, A total of 3x10<sup>6</sup> PC3 cells were injected  
821 subcutaneously into five locations on the back of nude mice, with increasing concentrations of  
822 HITI engineered cells, as indicated in yellow, and corresponding BLI signals. *B*, quantification of  
823 BLI signal from ROIs around the five PC3 injection sites. *C*, MRI transverse views of cell injection  
824 sites 5 hours after Gd-EOB-DTPA injection. *D*, quantification of contrast-to-noise (CNR) ratio for  
825 10<sup>6</sup> and 3x10<sup>6</sup> PC3-HITI cells. Note, 10<sup>4</sup> and 10<sup>5</sup> PC3-HITI injections lacked enough contrast to  
826 measure CNR values. n = 3 mice, \* *P* < 0.05, \*\* *P* < 0.01, \*\*\* *P* < 0.001.

## Figure 5

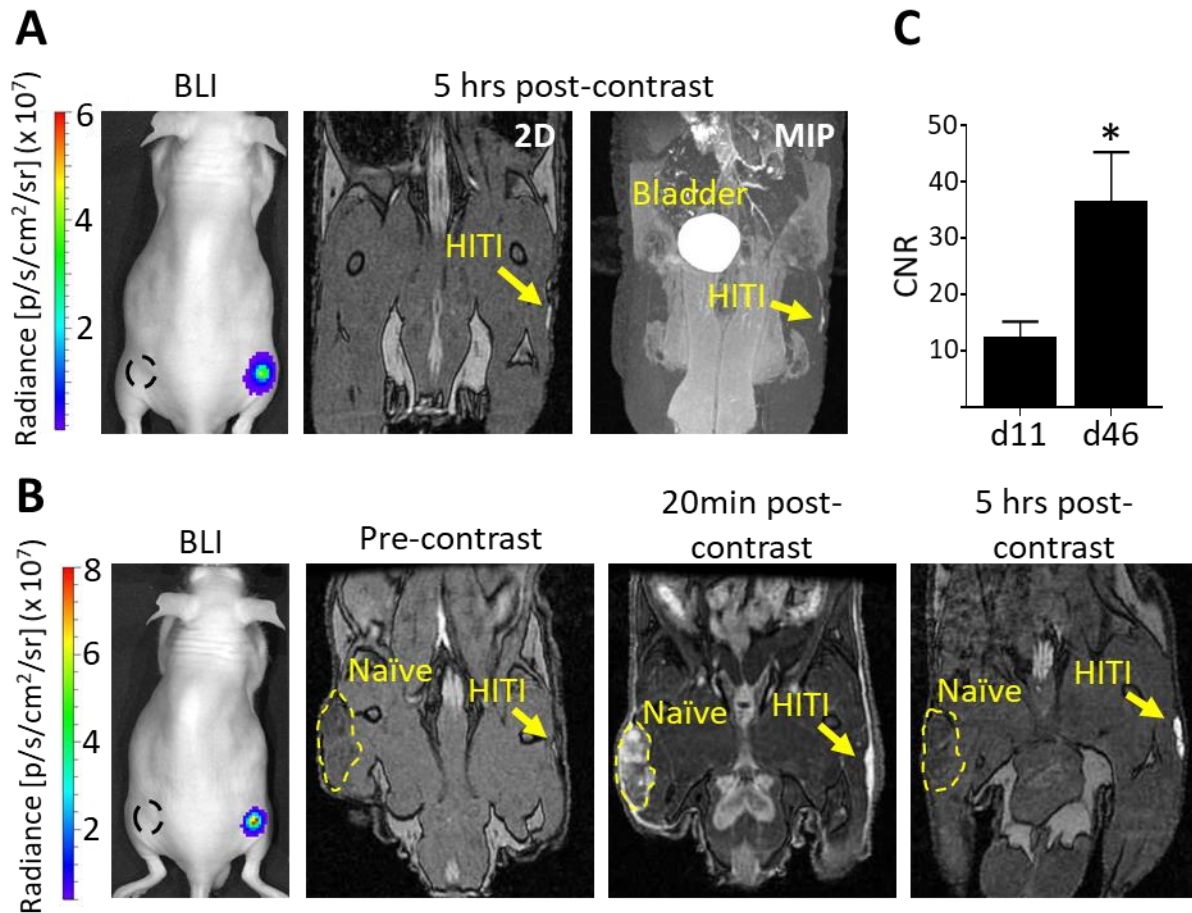

827  
828 Figure 5. Longitudinal *in vivo* MRI of subcutaneous PC3-HITI cells. Mice were injected  
829 subcutaneously with  $1 \times 10^6$  naïve and PC3-HITI cells on the left and right flanks, respectively. BLI  
830 signal was present on right flank only. Naïve tumour locations are denoted by black dashed line.  
831 *A*, day 11 post PC3 injection. 2D and maximum intensity projection (MIP) images acquired 5 hrs  
832 post Gd-EOB-DTPA injection. *B*, the same mouse was re-imaged at day 46. Pre-, 20min post- and  
833 5hr post-contrast coronal images were obtained. *C*, contrast-to-noise ratios (CNR) of PC3-HITI  
834 tumours 5hr post-contrast showed significant increase from day 11 to day 46.  $n = 4$  (day 11) and  
835  $n = 3$  (day 46) \*  $P < 0.05$ .  
836



## Figure 6

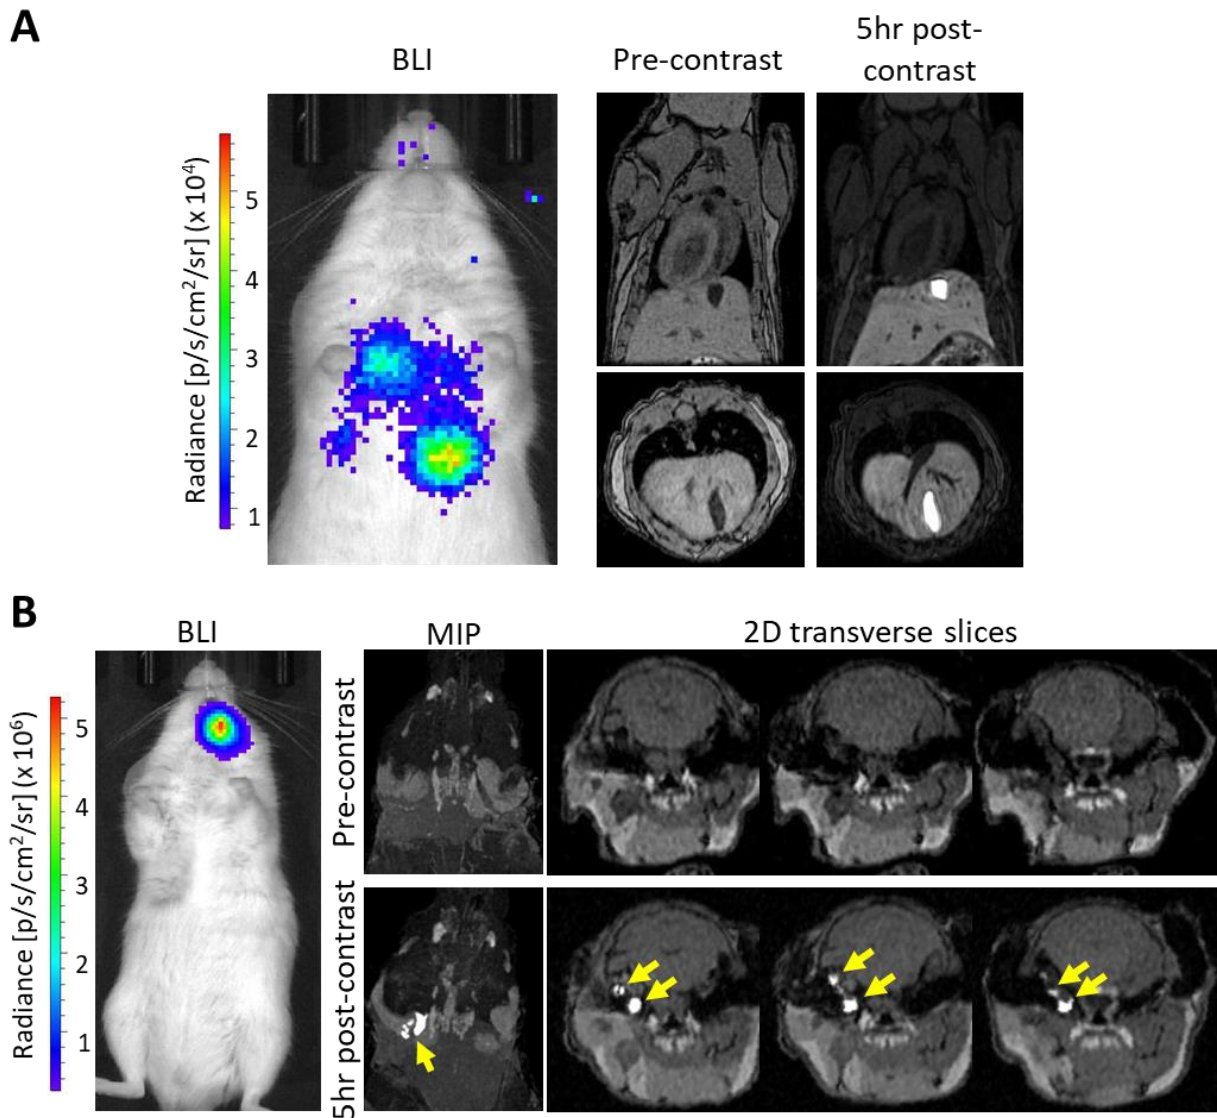

837  
838

839 Figure 6. *In vivo* MRI detection of metastatic PC3-HITI tumours. *A*, The brightest BLI signal  
840 corresponded to a tumour in the liver, which is evident as a shadow in pre-contrast images and as  
841 a bright positive Gd-EOB-DTPA contrast tumour in images taken 5 hrs post-contrast injection. *B*,  
842 A mouse showed BLI signal in the head region, which was not evident in pre-contrast MIP and  
843 2D transverse MRI slices (upper panel). However, clusters of PC3-HITI tumours were easily  
844 discernible in 5hr post-contrast images (yellow arrows, lower panel).  
845
